# Supplementary material for: On a high photocatalytic activity of high-noble alloys Au–Ag/TiO2 catalysts during oxygen evolution reaction of water oxidation
Source: PubMed Central journal article supplement (PMC8850597; doi:10.1038/s41598-022-06608-7), 2022-02-16
Supplement: 41598_2022_6608_MOESM1_ESM.pdf [file 41598_2022_6608_MOESM1_ESM.pdf]

## On a high photocatalytic activity of high-noble alloys Au-Ag/TiO<sub>2</sub> catalysts during oxygen evolution reaction of water oxidation

Anum Shahid Malik<sup>1,2</sup>, Taifeng Liu<sup>3,\*</sup>, Meena Rittirum<sup>1,2,4</sup>, Tinnakorn Saelee<sup>1,2,5</sup>,  
Juarez L. F. Da Silva<sup>6</sup>, Supareak Prasertthdam<sup>1,2,\*</sup>, Piyasan Prasertthdam<sup>2</sup>

1. High-Performance Computing Unit (CECC-HCU), Center of Excellence on Catalysis and Catalytic Reaction Engineering (CECC), Chulalongkorn University, Bangkok 10330, Thailand.
2. Center of Excellence on Catalysis and Catalytic Reaction Engineering (CECC), Chulalongkorn University, Bangkok 10330, Thailand.
3. National & Local Joint Engineering Research Center for Applied Technology of Hybrid Nanomaterials, Henan University, Kaifeng, 475004, China.
4. Rittirum Research Group, Bangkok 10330 Thailand.
5. Saelee Research Group, Bangkok 10330 Thailand.
6. São Carlos Institute of Chemistry, University of São Paulo, PO Box 780, 13560-970 São Carlos, SP, Brazil

\* Email of corresponding author (Dr. Taifeng Liu): [tliu@vip.henu.edu.cn](mailto:tliu@vip.henu.edu.cn)

\* Email of corresponding author (Dr. Supareak Prasertthdam): [supareak.p@chula.ac.th](mailto:supareak.p@chula.ac.th)

**Keywords:** High noble alloys catalysts, rutile TiO<sub>2</sub>, water oxidation. oxygen evolution reaction, density functional theory

### In the supporting information, it contains

1. The calculation scheme for free energy for oxygen evolution reaction (OER.).
2. Optimized geometries of OER intermediates.
3. Free energy diagrams.
4. Band Structure for Au<sub>4</sub>/TiO<sub>2</sub> and Ag<sub>4</sub>/TiO<sub>2</sub>:
5. Relative free energies tables.

## 1. Free energy calculation scheme for oxygen evolution reaction (OER.)

Thermodynamic potential for water oxidation,  $2\text{H}_2\text{O} \rightarrow \text{O}_2 + 4\text{H}^+ + 4\text{e}^-$ , is 4.92 V at standard conditions ( $T = 298.15$  K,  $P = 1$  bar,  $\text{pH} = 0$ ). Nevertheless, a potential of 1.23 V is required in order for this reaction to proceed at a measurable rate. For heterogeneous catalysts, this additional potential is referred to as the overpotential  $\eta$ . To setup the thermo chemistry of the OER, it is more convenient to work at acidic conditions, where steps

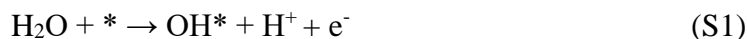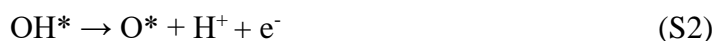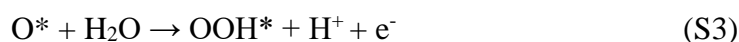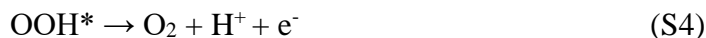

The Gibbs free energy change for steps I-IV can be expressed as,

$$\Delta G_{\text{I}} = \Delta G_{\text{OH}} - eU + \Delta G_{\text{H}^+}(\text{pH}) \quad (\text{S5})$$

$$\Delta G_{\text{II}} = \Delta G_{\text{O}} - \Delta G_{\text{OH}} - eU + \Delta G_{\text{H}^+}(\text{pH}) \quad (\text{S6})$$

$$\Delta G_{\text{III}} = \Delta G_{\text{OOH}} - \Delta G_{\text{O}} - eU + \Delta G_{\text{H}^+}(\text{pH}) \quad (\text{S7})$$

$$\Delta G_{\text{IV}} = 4.92 \text{ (eV)} - \Delta G_{\text{OOH}} - eU + \Delta G_{\text{H}^+}(\text{pH}) \quad (\text{S8})$$

Where  $U$  is the potential measured against normal hydrogen electrode (NHE) at standard conditions ( $T = 298.15$  K,  $P = 1$  bar,  $\text{pH} = 0$ ). The Nernst equation represents the free energy change of the protons relative to the above-specified electrode at non-zero  $\text{pH}$  as  $\Delta G_{\text{H}^+}(\text{pH}) = -kT \ln(10) \times \text{pH}$ . The sum of  $\Delta G_{\text{I-IV}}$  is fixed to the negative of experimental Gibbs free energy of formation of two water molecules  $-2\Delta G_{\text{H}_2\text{O}} = 4 \times 1.23 = 4.92$  eV to avoid calculating the  $\text{O}_2$  bond energy, which is difficult to determine accurately within DFT [1]. The Gibbs free energies of eqs 5-8 depending on the adsorption energies of  $\text{OH}^*$ ,  $\text{O}^*$ , and  $\text{OOH}^*$ . The Gibbs free energy differences of these intermediates include zero-point energy (Z.P.E.) and entropy corrections accordingly,  $\Delta G_i = \Delta E + \Delta \text{ZPE} - T\Delta S_i$  and energy differences  $\Delta E_i$  considered relative to  $\text{H}_2\text{O}$  and  $\text{H}_2$  (at  $U = 0$  and  $\text{pH} = 0$ ) as

$$\Delta E_{\text{OH}} = E(\text{OH}^*) - E(^*) - [E(\text{H}_2\text{O}) - 1/2 E(\text{H}_2)] \quad (\text{S9})$$

$$\Delta E_{\text{O}} = E(\text{O}^*) - E(^*) - [E(\text{H}_2\text{O}) - E(\text{H}_2)] \quad (\text{S10})$$

$$\Delta E_{\text{OOH}} = E(\text{OOH}^*) - E(^*) - [2E(\text{H}_2\text{O}) - 3/2 E(\text{H}_2)] \quad (\text{S11})$$

The theoretical overpotential is defined as:

$$\eta = \max [\Delta G_{\text{I}}, \Delta G_{\text{II}}, \Delta G_{\text{III}}, \Delta G_{\text{IV}}] / e - 1.23 \text{ [V]} \quad (\text{S12})$$

$\Delta G = \Delta E + \Delta \text{Z.P.E.} - T\Delta S$  is calculated as follows:  $\Delta E$  is reaction energy that we get from density functional theory (DFT).  $\Delta \text{Z.P.E.}$  and  $\Delta S$  are the differences in zero-point energies and the change in entropy, respectively, obtained from references [2, 3].

Table 1S: Differences in Zero-Point Energies,  $\Delta \text{Z.P.E.}$ , and the Change in Entropy  $\Delta S$ .

| $\text{H}_2\text{O} + ^* \rightarrow$<br>$\text{OH}^* + 1/2 \text{H}_2$<br>( $\Delta \text{Z.P.E.} - T\Delta S$ ) <sub>I</sub> | $\text{OH}^* \rightarrow$<br>$\text{O}^* + 1/2 \text{H}_2$<br>( $\Delta \text{Z.P.E.} - T\Delta S$ ) <sub>II</sub> | $\text{O}^* + \text{H}_2\text{O} \rightarrow$<br>$\text{O}^* + 1/2 \text{H}_2$<br>( $\Delta \text{Z.P.E.} - T\Delta S$ ) <sub>III</sub> | $\text{O}^* + \text{H}_2\text{O} \rightarrow$<br>$\text{O}_2 + ^* + 1/2 \text{H}_2$<br>( $\Delta \text{Z.P.E.} - T\Delta S$ ) <sub>IV</sub> |
|--------------------------------------------------------------------------------------------------------------------------------|--------------------------------------------------------------------------------------------------------------------|-----------------------------------------------------------------------------------------------------------------------------------------|---------------------------------------------------------------------------------------------------------------------------------------------|
| + 0.40                                                                                                                         | - 0.30                                                                                                             | + 0.32                                                                                                                                  | - 0.42                                                                                                                                      |

## 2. Optimized geometries for OER intermediates:

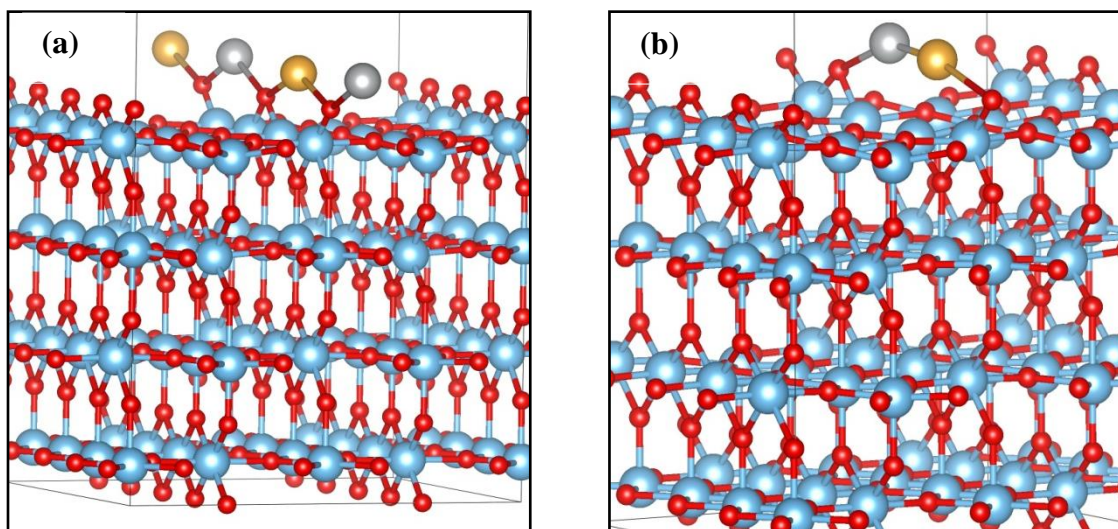

Figure S1: Initial model of Ag-Au/TiO<sub>2</sub> models with least stability, considered for OER

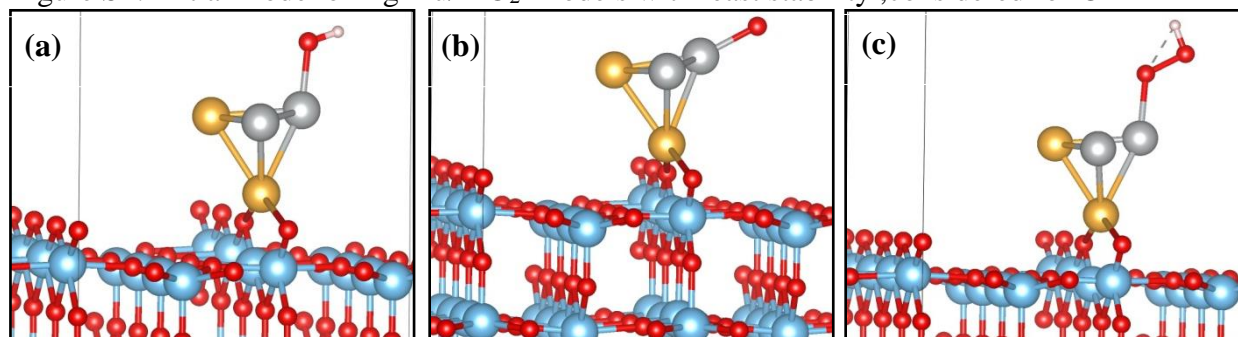

calculations.

Figure S2: OER optimized intermediates on bridging row oxygen vacant site at 'Ag' active site: (a) Ag-OH\* (b) Ag-O\* (c) Ag-OOH\*

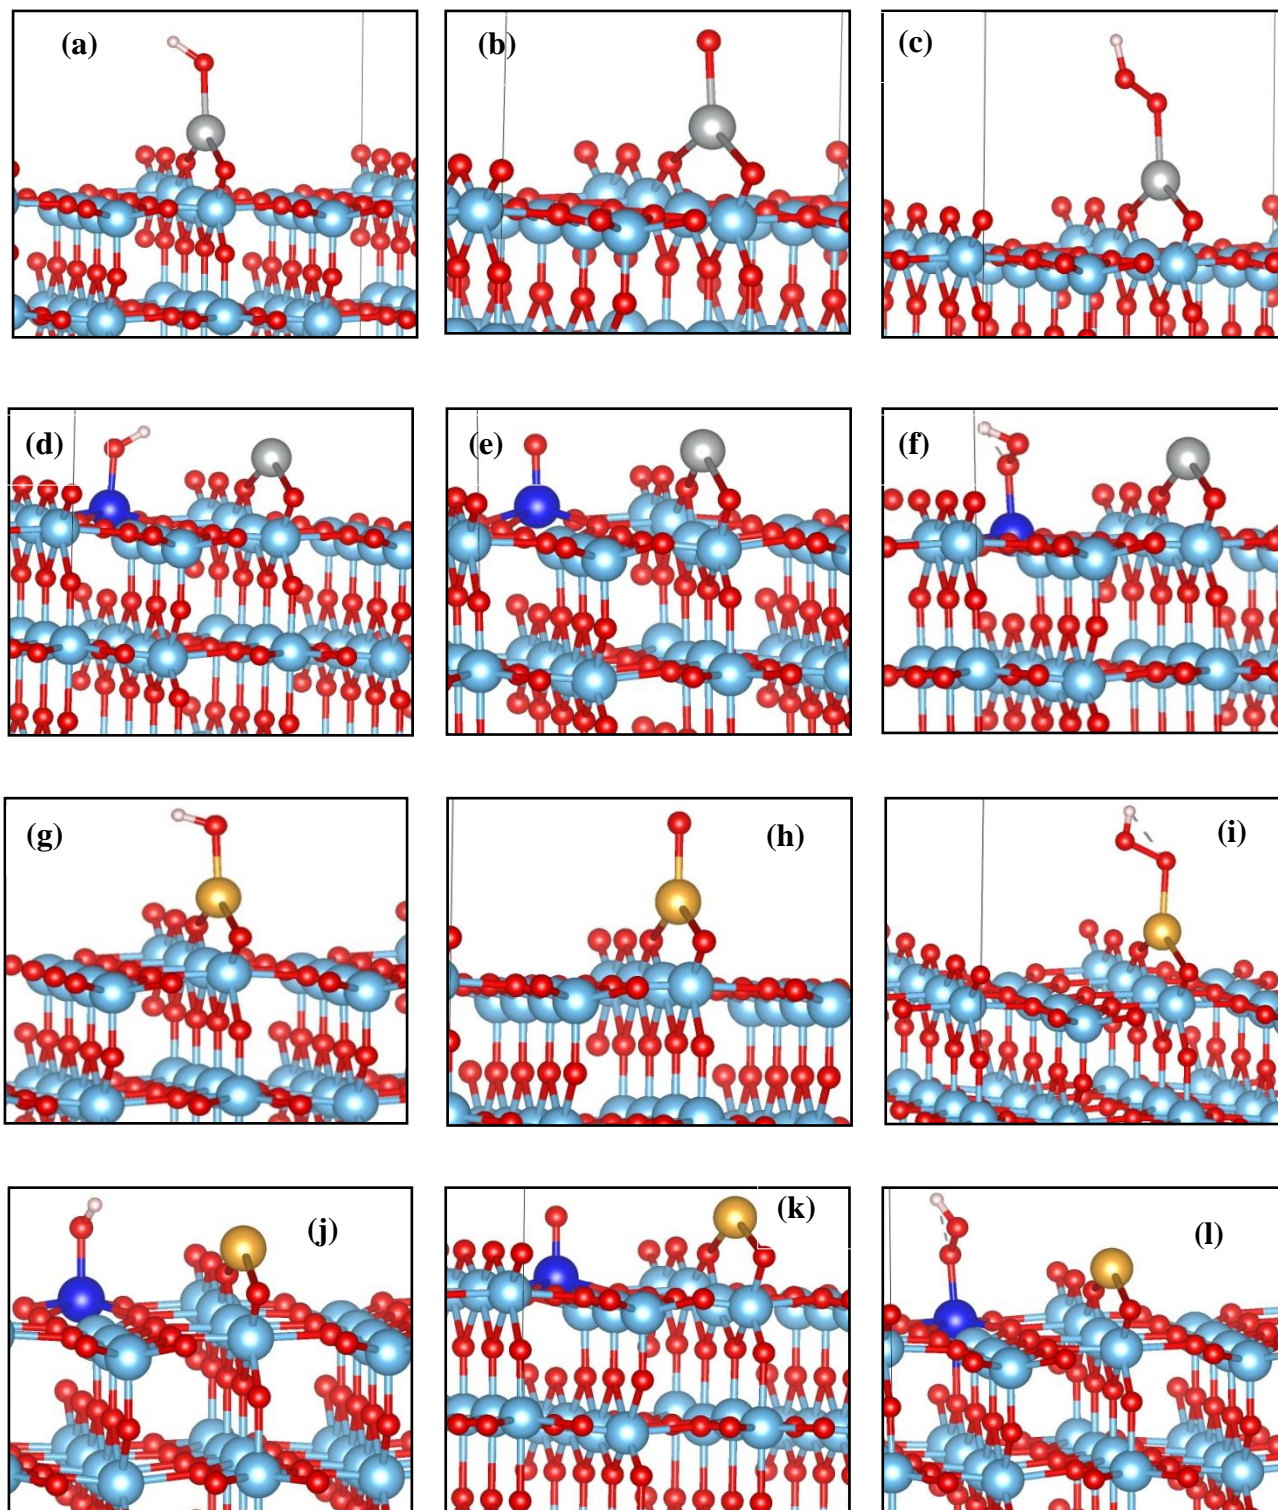

Figure S3: OER optimized intermediates on bridging oxygen vacant site (initial model) Ag/TiO<sub>2</sub>, Ag active site (a) OH\*-Ag, (b) O\*- Ag (c) OOH\*-Ag ; Ti active site (d) OH\*-Ti, (e) O\*- Ti (f) OOH\*-Ti ; Au/TiO<sub>2</sub>, Au active site (g) OH\*-Au, (h) O\*- Au (i) OOH\*- Au ; Ti active site (j) OH\*-Ti, (k) O\*- Ti (l) OOH\*-Ti.



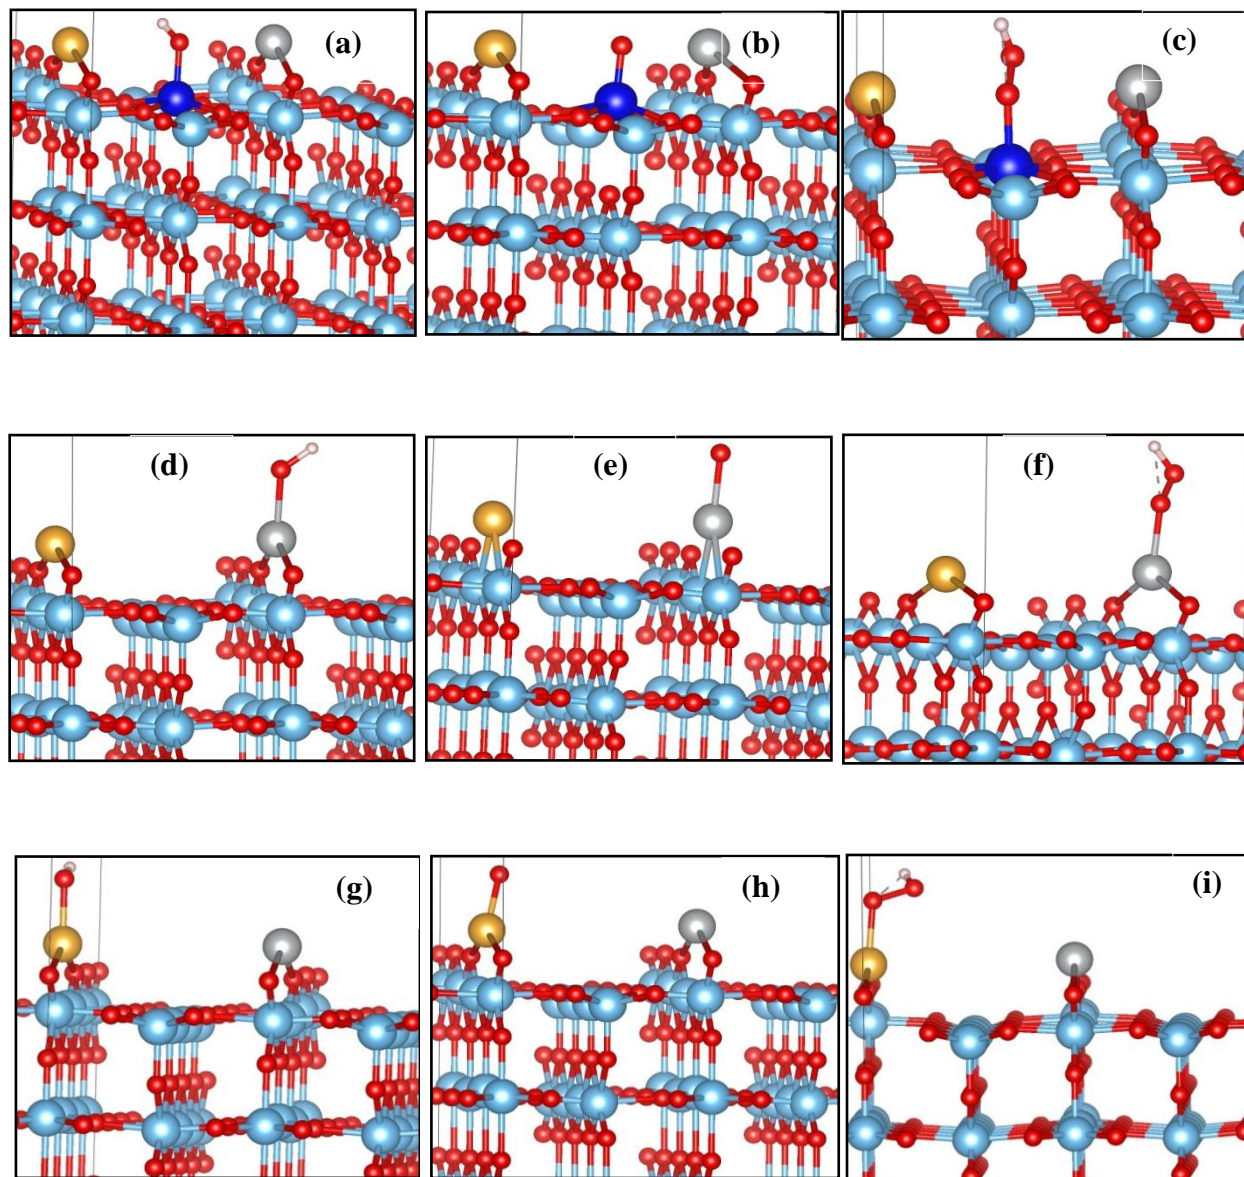

Figure S4: OER optimized intermediates on two bridging rows oxygen vacant sites (initial models) Au-Ag/TiO<sub>2</sub>, Ti active site (a) OH<sup>\*</sup>- Ti, (b) O<sup>\*</sup>- Ti (c) OOH<sup>\*</sup>- Ti. Ag active site (d) OH<sup>\*</sup>-Ag (e) O<sup>\*</sup>- Ag (f) OOH<sup>\*</sup>-Ag ; Au active site (g) OH<sup>\*</sup>-Au (h) O<sup>\*</sup>- Au (i) OOH<sup>\*</sup>-Au.

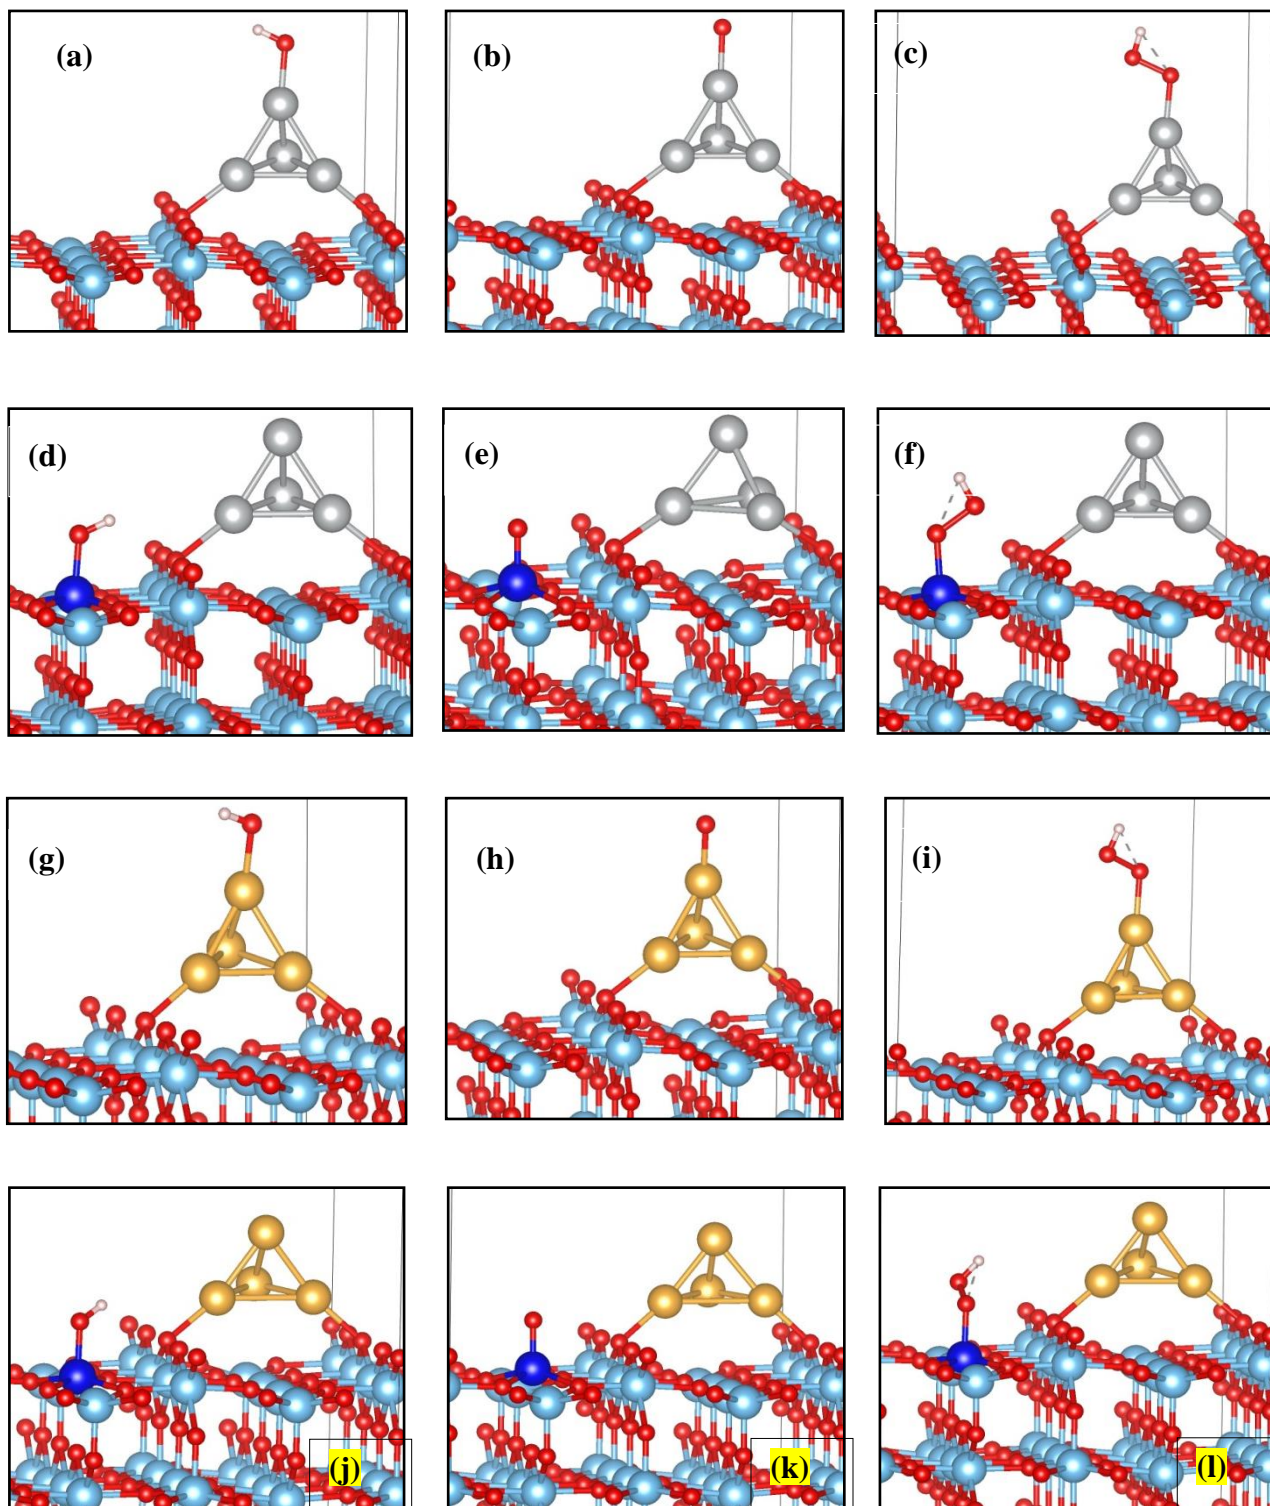

Figure S5: OER optimized intermediates on two bridging oxygen rows  $\text{Ag}_4/\text{TiO}_2$ ,  $\text{Ag}$  active site (a)  $\text{OH}^*$ - $\text{Ag}$ , (b)  $\text{O}^*$ - $\text{Ag}$  (c)  $\text{OOH}^*$ - $\text{Ag}$ ;  $\text{Ti}$  active site (d)  $\text{OH}^*$ - $\text{Ti}$ , (e)  $\text{O}^*$ - $\text{Ti}$  (f)  $\text{OOH}^*$ - $\text{Ti}$ ;  $\text{Au}_4/\text{TiO}_2$ ,  $\text{Au}$  active site (g)  $\text{OH}^*$ - $\text{Au}$ , (h)  $\text{O}^*$ - $\text{Au}$  (i)  $\text{OOH}^*$ - $\text{Au}$ ;  $\text{Ti}$  active site (j)  $\text{OH}^*$ - $\text{Ti}$ , (k)  $\text{O}^*$ - $\text{Ti}$  (l)  $\text{OOH}^*$ - $\text{Ti}$ .



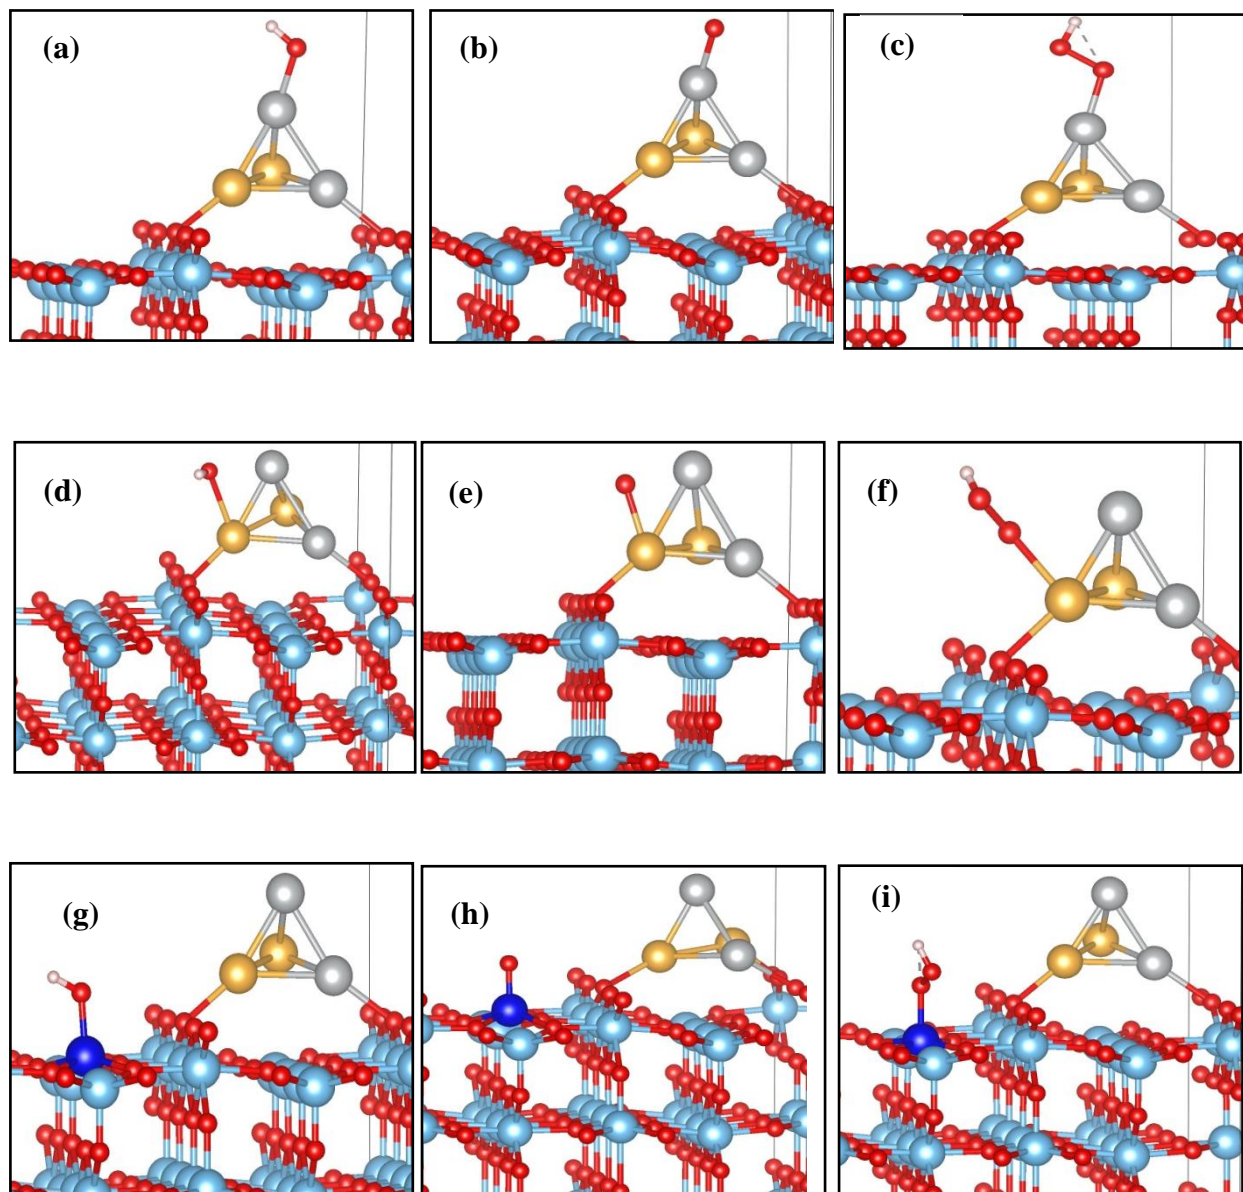

Figure S6: OER optimized intermediates on two bridging oxygen rows  $\text{Au}_2\text{-Ag}_2/\text{TiO}_2$ , Ag active site (a)  $\text{OH}^*\text{-Ag}$ , (b)  $\text{O}^*\text{-Ag}$  (c)  $\text{OOH}^*\text{-Ag}$ ; Au active site (d)  $\text{OH}^*\text{-Au}$ , (e)  $\text{O}^*\text{-Au}$  (f)  $\text{OOH}^*\text{-Au}$ ; Ti active site (g)  $\text{OH}^*\text{-Ti}$ , (h)  $\text{O}^*\text{-Ti}$  (i)  $\text{OOH}^*\text{-Ti}$ .



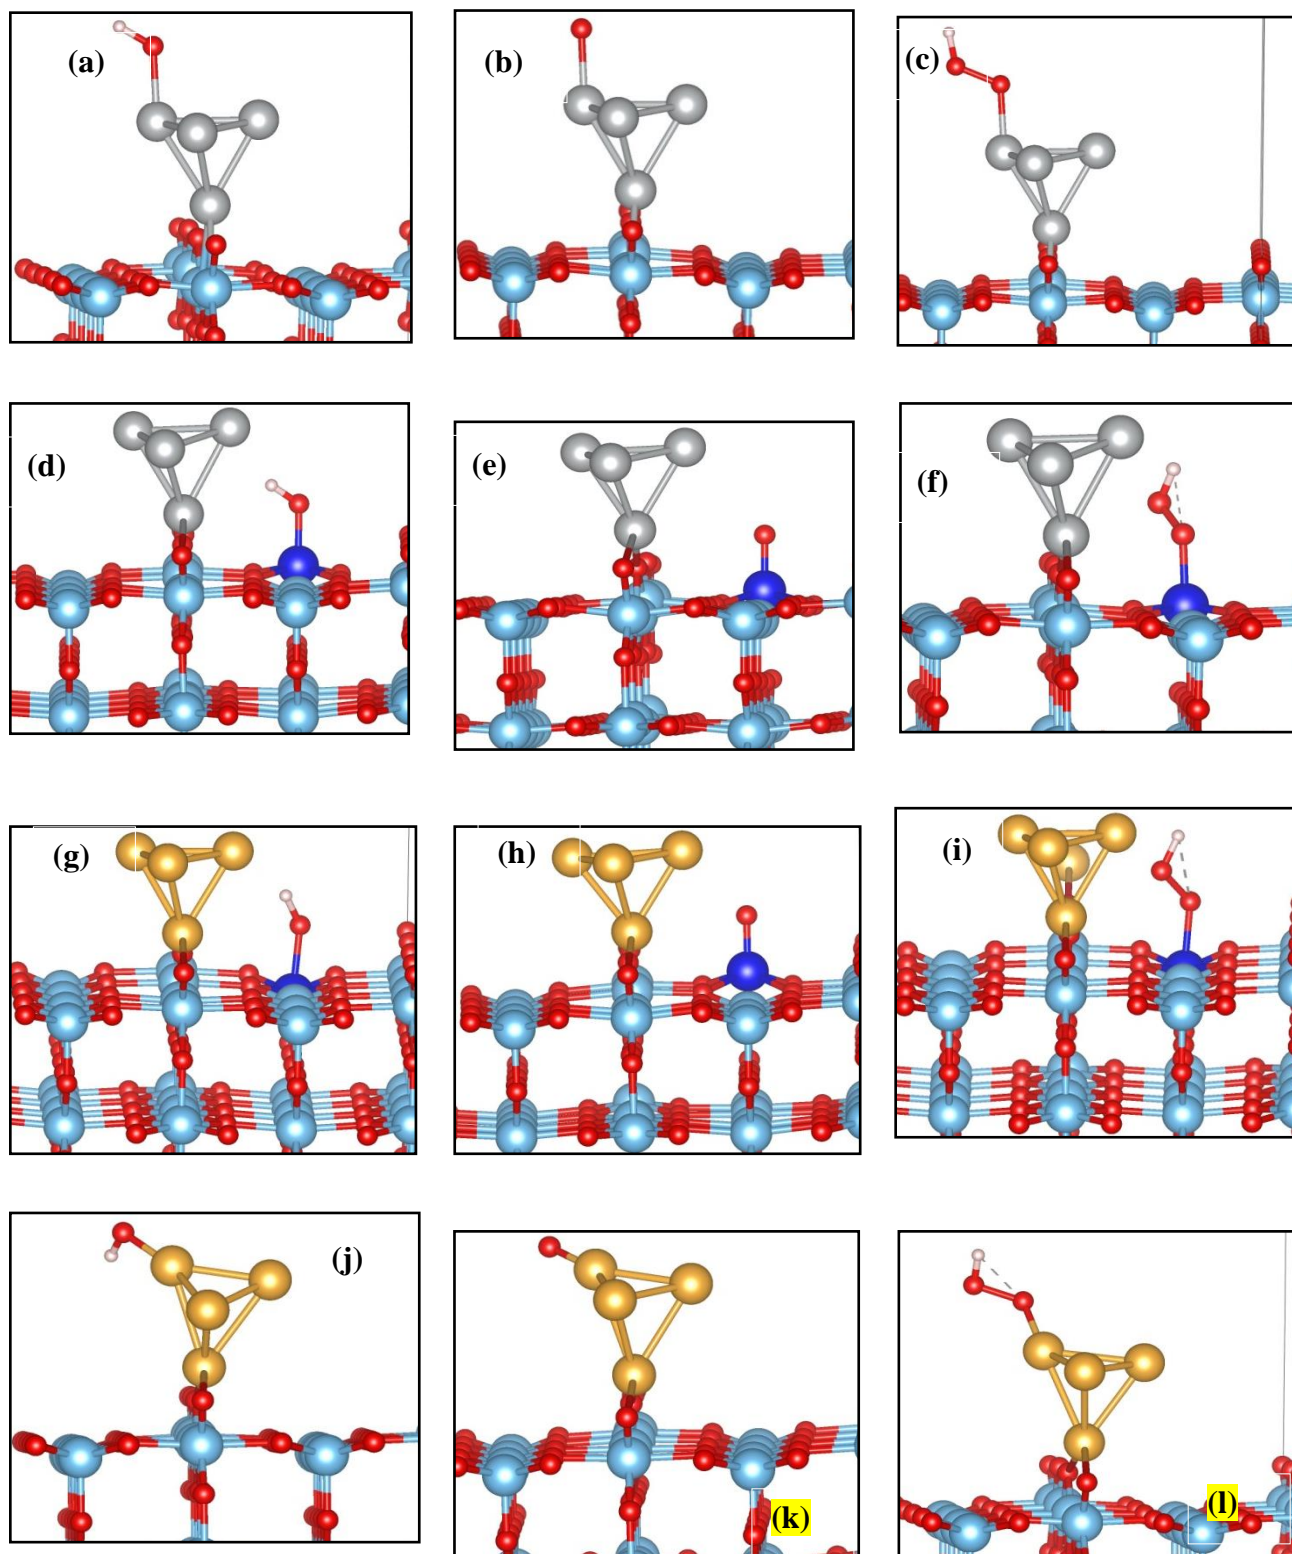

Figure S7: OER optimized intermediates of  $\text{Ag}_4/\text{TiO}_2$  placed on oxygen vacant site, Ag active site (a)  $\text{OH}^*$ -Ag, (b)  $\text{O}^*$ -Ag (c)  $\text{OOH}^*$ -Ag ; Ti active site (d)  $\text{OH}^*$ -Ti, (e)  $\text{O}^*$ -Ti (f)  $\text{OOH}^*$ -Ti ;  $\text{Au}_4/\text{TiO}_2$  , Ti active site (g)  $\text{OH}^*$ -Ti, (h)  $\text{O}^*$ -Ti (i)  $\text{OOH}^*$ -Ti ; Au active site (j)  $\text{OH}^*$ -Au, (k)  $\text{O}^*$ -Au (l)  $\text{OOH}^*$ -Au.

### 3. Free Energy Diagram:

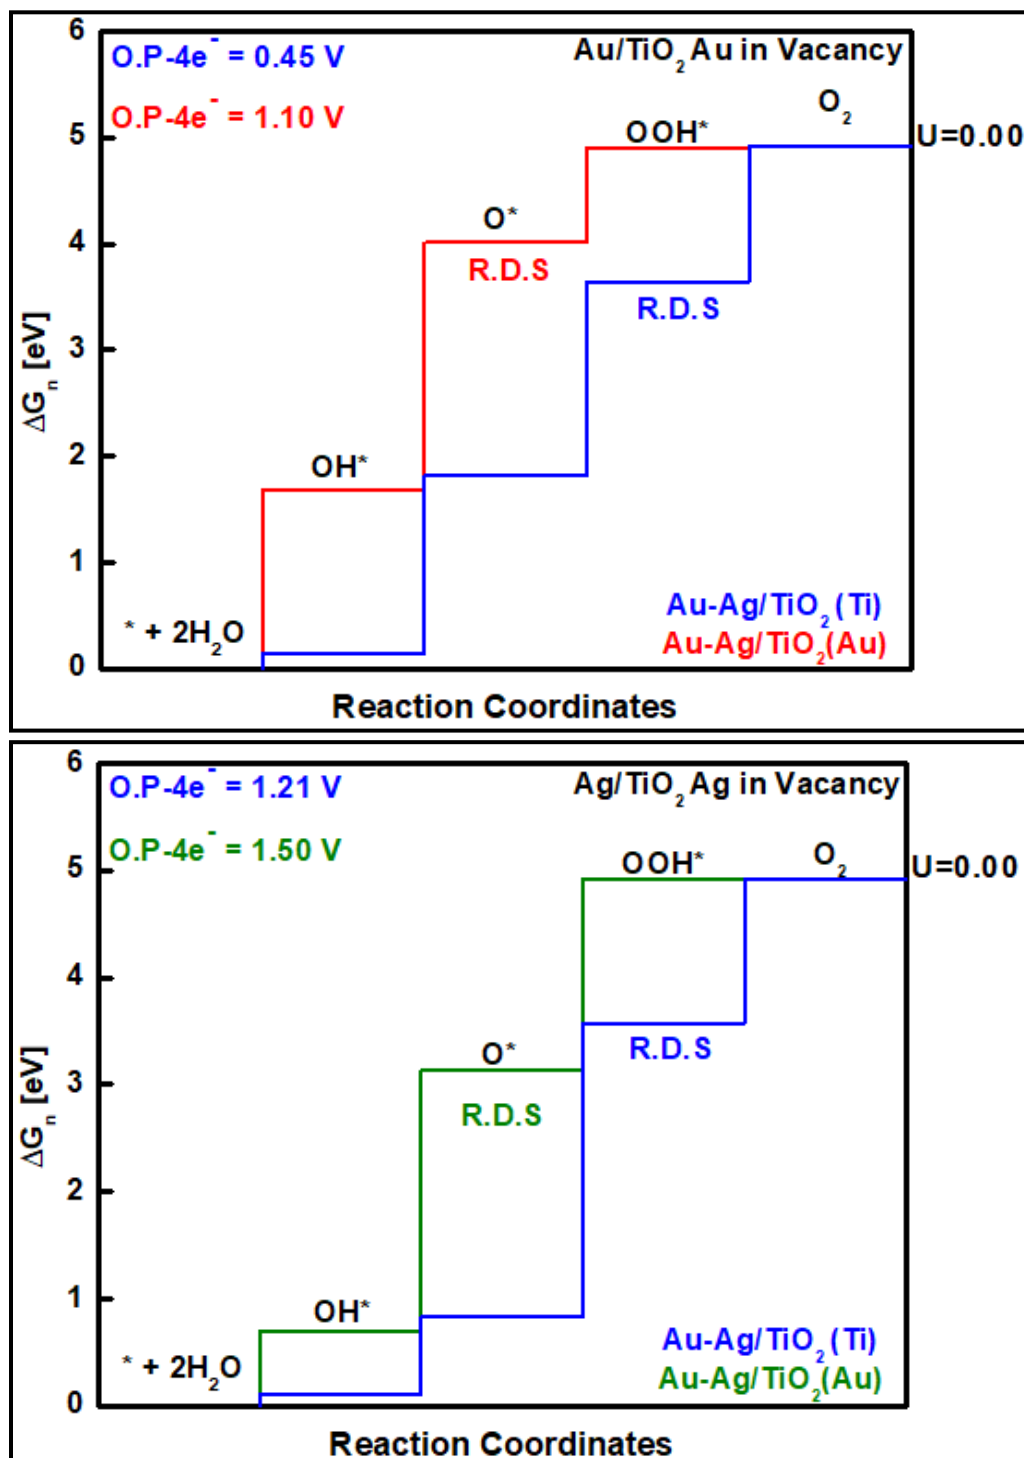

Figure S8: Comparative free energy diagram (initial model) for Au/TiO<sub>2</sub> and Ag/TiO<sub>2</sub> on bridging oxygen vacant site.

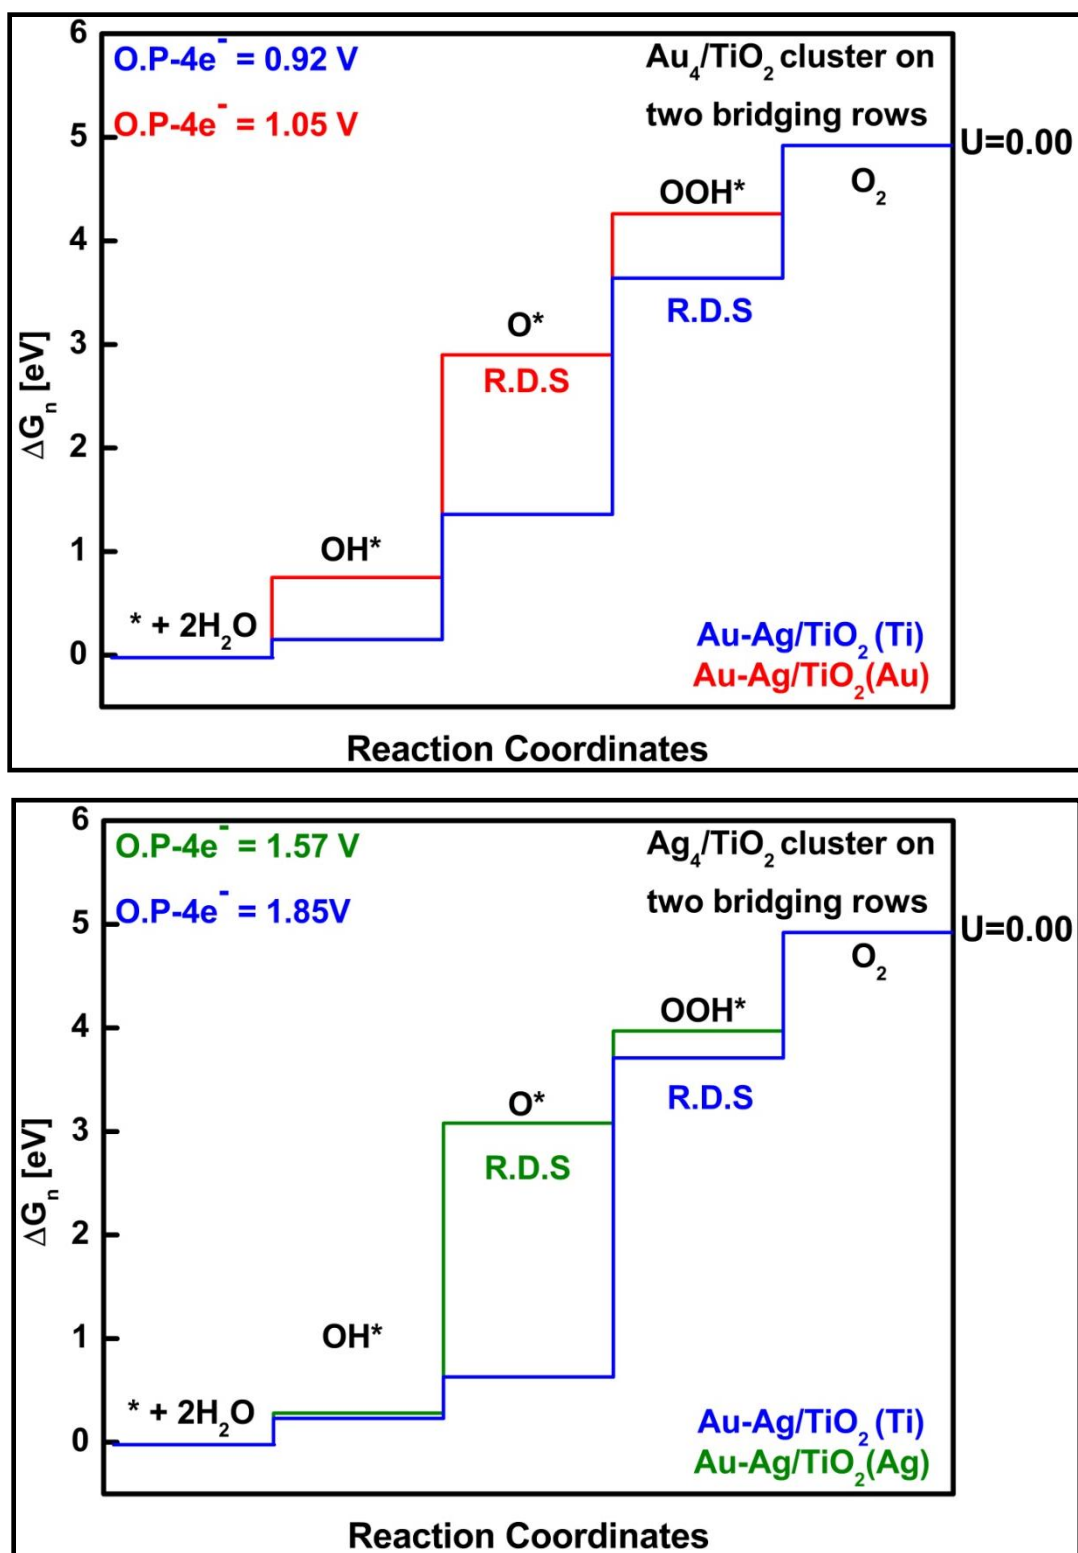

Figure S9: Comparative free energy diagram (cluster model) for Au<sub>4</sub>/TiO<sub>2</sub> and Ag<sub>4</sub>/TiO<sub>2</sub> on two bridging oxygen rows.

#### 4. Band Structure for Au<sub>4</sub>/TiO<sub>2</sub> and Ag<sub>4</sub>/TiO<sub>2</sub>:

Here we have shown the band structures for Au<sub>4</sub>/TiO<sub>2</sub> and Ag<sub>4</sub>/TiO<sub>2</sub> structures when Au and Ag four atoms are positioned on bridging oxygen vacant position. We found trap states in forbidden gap for both structures. Wang et al., reported band structure calculations on Au<sub>8</sub> atoms cluster on rutile TiO<sub>2</sub> structure. The author placed an Au<sub>8</sub> atom cluster on two bridging rows of TiO<sub>2</sub> surface and found similar trap states in the forbidden gap [4].

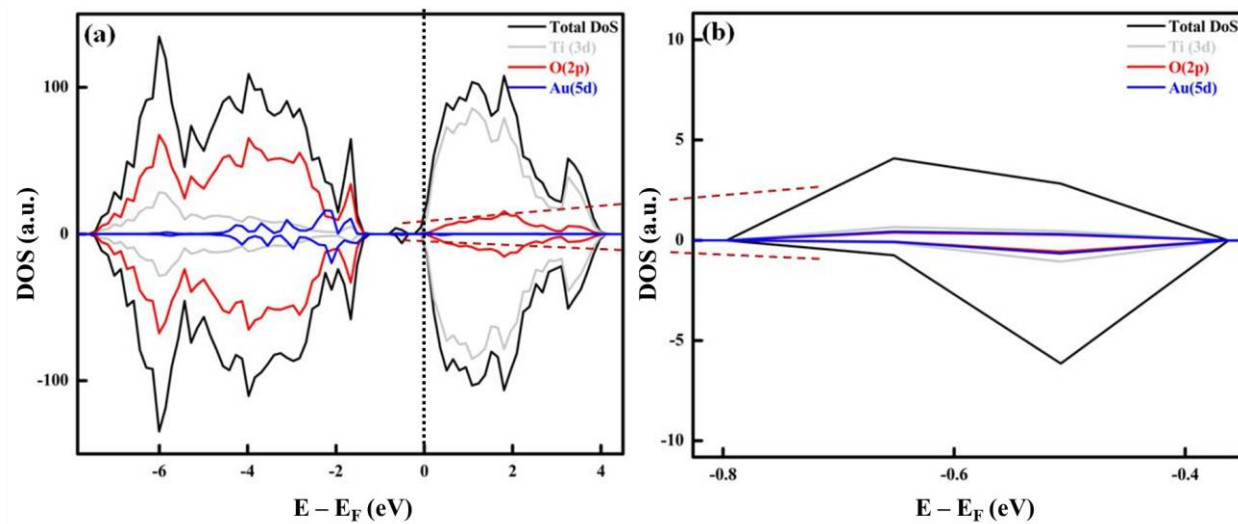

Figure S10: DOS results for four atoms cluster Au<sub>4</sub>/TiO<sub>2</sub> on bridging row oxygen vacant site of (a) Enlarged view of trap states which is majorly composed of Au(5d).

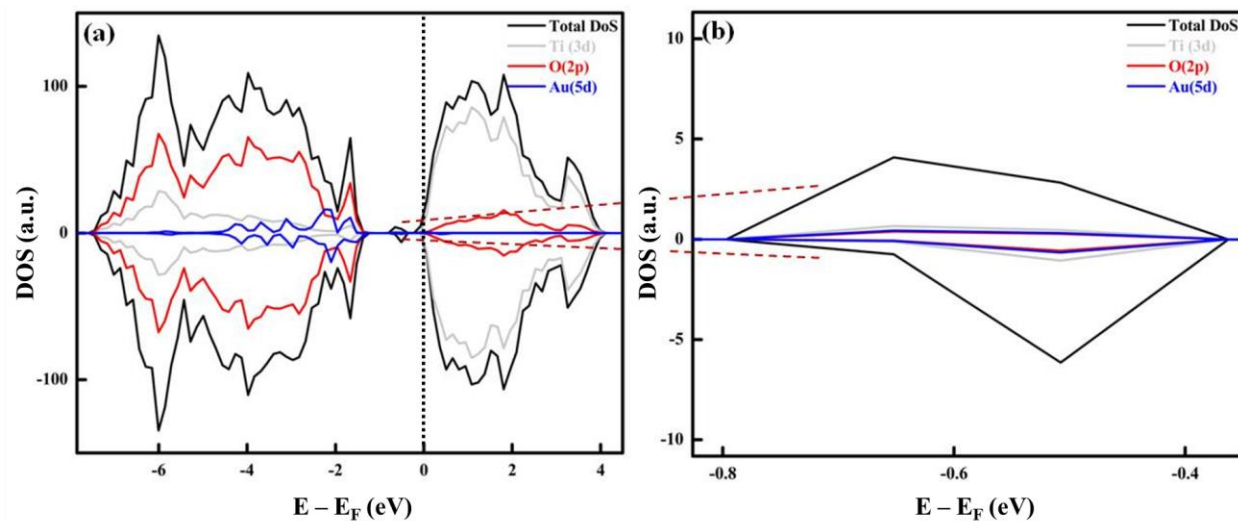

Figure S11: DOS results for four atoms cluster Ag<sub>4</sub>/TiO<sub>2</sub> on bridging row oxygen vacant site of (a) Enlarged view of trap states which is majorly composed of Ag(4d).



## 5. Relative free energies:

In table S2, the relative free energies for initial models shown in figure S3 are given. For the cluster model placed on two bridging rows, shown in figure S5, the relative energies are given in table S3, starting from  $\ast + 2\text{H}_2\text{O}$  (taken as zero energy) for  $\text{OH}^\ast$  ( $\Delta G_{\text{OH}^\ast}$ ),  $\text{O}^\ast$  ( $\Delta G_{\text{O}^\ast}$ ),  $\text{O}^\ast$  ( $\Delta G_{\text{OOH}^\ast}$ ) and the associated overpotentials for all systems. '\*' represents rate-determining steps.

**Table S2:** Relative free energies for **Initial Model** Ag-TiO<sub>2</sub>, replacing bridging O atoms on surface with Ag atom

**Table S3:** Relative free energies for '**Cluster model**' Ag<sub>4</sub>-TiO<sub>2</sub> and Au<sub>4</sub>-TiO<sub>2</sub> cluster on two

| <b>System: Ag-TiO<sub>2</sub>, replacing bridging O atoms on surface with Ag atom</b>         |                             |                            |                              |               |              |
|-----------------------------------------------------------------------------------------------|-----------------------------|----------------------------|------------------------------|---------------|--------------|
| <b>Intermediates</b>                                                                          | $\Delta G_{\text{OH}^\ast}$ | $\Delta G_{\text{O}^\ast}$ | $\Delta G_{\text{OOH}^\ast}$ | <b>O.P.</b>   | <b>R.D.S</b> |
| Ti active site                                                                                | 0.10                        | 0.84                       | <b>3.57*</b>                 | <b>1.50 V</b> | <b>OOH*</b>  |
| Ag active site                                                                                | 0.70                        | <b>3.14*</b>               | 4.92                         | <b>1.21 V</b> | <b>O*</b>    |
| <b>System: System: Au-TiO<sub>2</sub>, replacing bridging O atoms on surface with Ag atom</b> |                             |                            |                              |               |              |
| Ti active site                                                                                | 0.14                        | 1.82                       | <b>3.64*</b>                 | <b>0.45 V</b> | <b>OOH*</b>  |
| Au active site                                                                                | 1.68                        | <b>4.01*</b>               | 4.90                         | <b>1.10 V</b> | <b>O*</b>    |

bridging oxygen rows

| <b>System: Ag<sub>4</sub>-TiO<sub>2</sub>, cluster on two bridging oxygen rows</b> |                             |                            |                              |               |              |
|------------------------------------------------------------------------------------|-----------------------------|----------------------------|------------------------------|---------------|--------------|
| <b>Intermediates</b>                                                               | $\Delta G_{\text{OH}^\ast}$ | $\Delta G_{\text{O}^\ast}$ | $\Delta G_{\text{OOH}^\ast}$ | <b>O.P.</b>   | <b>R.D.S</b> |
| Ti active site                                                                     | 0.23                        | 0.63                       | <b>3.71*</b>                 | <b>1.85 V</b> | <b>OOH*</b>  |
| Ag active site                                                                     | 0.28                        | <b>3.08*</b>               | 3.97                         | <b>1.57 V</b> | <b>O*</b>    |
| <b>System: Au<sub>4</sub>-TiO<sub>2</sub>, cluster on two bridging oxygen rows</b> |                             |                            |                              |               |              |
| Ti active site                                                                     | 0.15                        | 1.36                       | <b>3.64*</b>                 | <b>1.05 V</b> | <b>O*</b>    |
| Au active site                                                                     | 0.75                        | <b>2.90*</b>               | 4.26                         | <b>0.92 V</b> | <b>OOH*</b>  |

**References:**

- [1] Nørskov JK, Rossmeisl J, Logadottir A, Lindqvist L, Kitchin JR, Bligaard T, et al. Origin of the overpotential for oxygen reduction at a fuel-cell cathode. *The Journal of Physical Chemistry B*. 2004;108:17886-92.
- [2] Rossmeisl J, Qu ZW, Zhu H, Kroes GJ, Nørskov JK. *Journal of Electroanalytical Chemistry* 2007. p. 83-9.
- [3] Valdés Á, Qu ZW, Kroes GJ, Rossmeisl J, Nørskov JK. Oxidation and Photo-Oxidation of Water on TiO<sub>2</sub> Surface. *The Journal of Physical Chemistry C*. 2008;112:9872-9.
- [4] Wang S, Gao Y, Miao S, Liu T, Mu L, Li R, et al. Positioning the Water Oxidation Reaction Sites in Plasmonic Photocatalysts. *Journal of the American Chemical Society*. 2017;139:11771-8.
